# Supplementary material
Source: Springer Nature journal article supplement (https://www.springermedizin.de/resource/supplementary/13014_2011_587_MOESM9_ESM.pdf/9634158)

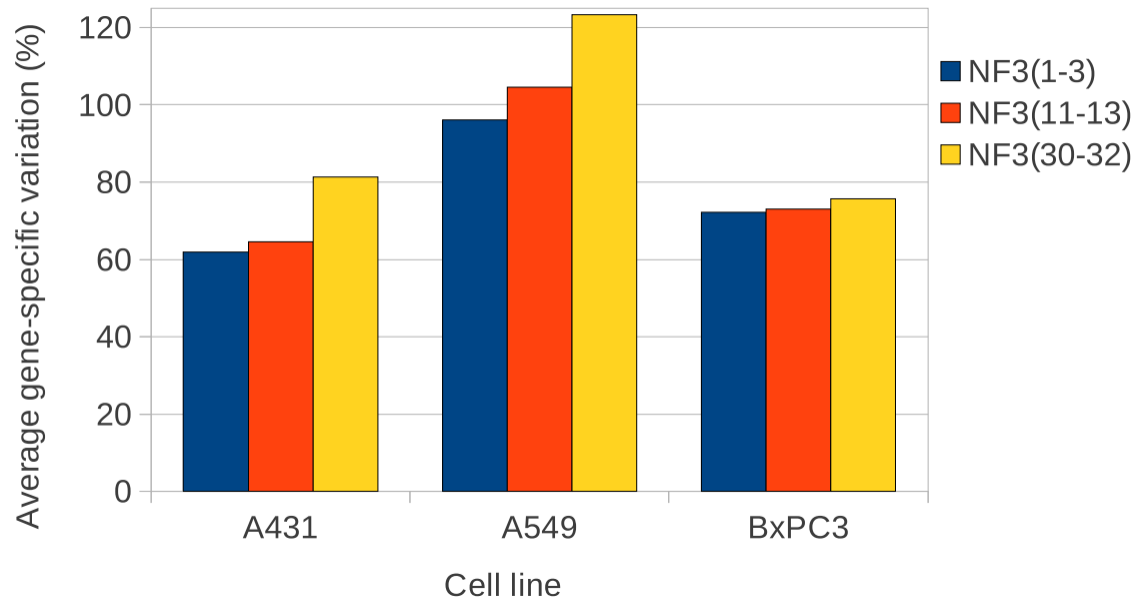

Supplement: MOESM9 [file 9634158]
